# Supplementary material for: De novo methylation of histone H3K23 by the methyltransferases EHMT1/GLP and EHMT2/G9a
Source: Research Square preprint supplement (doi:10.21203/rs.3.rs-1842108/v1), 2022-07-18
Supplement: Supplementary file 1 [file 09d1c11d09dd52e6b9de1941.pdf]

**Table 1: Detectable histone H3 methylation states for the *in vitro* HMT assays with EHMT1/GLP and EHMT2/G9a**

| EHMT1/GLP |             |           |            |
|-----------|-------------|-----------|------------|
|           | Mono-methyl | Di-methyl | Tri-methyl |
| Lysine 4  | X           | X         | X          |
| Lysine 9  | ✓           | ✓         | ✓          |
| Lysine 14 | X           | X         | X          |
| Lysine 18 | ✓           | ✓         | ✓          |
| Lysine 23 | ✓           | ✓         | ✓          |
| Lysine 27 | ✓           | ✓         | ✓          |
| Lysine 36 | X           | X         | X          |

  

| EHMT2/G9a |             |           |            |
|-----------|-------------|-----------|------------|
|           | Mono-methyl | Di-methyl | Tri-methyl |
| Lysine 4  | X           | X         | X          |
| Lysine 9  | ✓           | ✓         | ✓          |
| Lysine 14 | X           | X         | X          |
| Lysine 18 | ✓           | ✓         | ✓          |
| Lysine 23 | ✓           | ✓         | X          |
| Lysine 27 | ✓           | ✓         | ✓          |

**Table 1** shows the individual methylation states, detected by western blot and mass spec., for the *in vitro* HMT reactions with EHMT1/GLP and EHMT2/G9a.
